# Supplementary material
Source: PubMed Central journal article supplement (PMC2667055)
Supplement: 0809960106_0809960106SI.pdf [file 0809960106_0809960106SI.pdf]

# Supporting Information

Barton et al. 10.1073/pnas.0809960106

## SI Text

**Domestication.** Domestication is both a process and a resultant state (1). The process is one of adaptation to a novel environment defined by the interactions between people, plants, and/or animals. Construction of this relationship is the very beginning of agricultural origins, and the intensification of it is a hypersensitive coevolutionary regime. The resultant state is the condition of numerous interacting organisms each with novel physical or behavioral attributes specific to their adaptive history. In plants it includes things like larger seeds or simultaneous ripening (2), facial neotony or docility in animals (3), and even a reduction in total size, stature, and bone structure in humans (4). The attributes comprise the “adaptive syndrome of domestication” used to distinguish domesticated plants or animals from their wild or feral relatives.

The lag between the development of the initial relationship and the appearance of these morphological or genetic features is variable (5, 6). Not all symbiotic relationships between humans and other taxa result in domestication, but when they do they can take thousands of years, or they can happen within 20–50 years (7–10). Furthermore, domestication is a continuum of change dictated by the strength of selection, the genetic architecture of change, and the environmental parameters of both (11, 12). Because no single attribute in any one taxon constitutes domestication, prehistoric domestication is difficult to identify, which makes it difficult to talk about origins. If domestication is a process, and that process entails the evolutionary ratchet of symbiotic interaction, our attention should be trained on identifying, measuring, and explaining these interactions.

**The Archaeological Identity of Domestication.** Domestication is often gauged by the degree to which plants or animals have been modified from their wild type. Presumably, these changes tell us about the strength of human selection on a resource population and about the importance of this resource to human survival.

Plant domestication is typically viewed through a combination of morphology and genetics. Efforts to determine the identity of charred or desiccated remains of plants from archaeological contexts depend largely on interpretation of the adaptive syndrome of domestication, and expectations for how the morphological attributes of plants should evolve under selection (2, 13). Grain size, for example has long been used to identify domesticated plants from archaeological sites (14). However, overlapping variation across the plastic continuum of wild types, feral weeds, and crop varieties in a single plant species makes early domestication difficult to identify using morphology alone. Furthermore, the symbioses of domestication may exist without morphological change, and some of the traits we attribute to it may also appear without domestication.

Molecular analysis tells us about population history, the regions of the chromosome that control attributes affected by domestication, and the effects of domestication on genomewide variation (15). Additionally, if we opt to define domestication as genetic change itself (10), then molecular analysis should help us to see it. But because the genetic marker is actually a result of the domestic relationship, on its own the marker adds little to our understanding of process, nor does it explain how the genetic change occurred. Furthermore, many of these molecular evaluations rely on a comparison between different populations of the same plant, including the wild type, the weed, and the crop. If the wild type is unknown (as it currently is in *Panicum*

*miliaceum*, the plant under inspection in northern China) then the power of the analysis is low.

As with plants, animals can be studied with morphology and genetics, and the limitations of documenting the domestic relationship are similar (16). Animals have their own analog to the wild-weed-crop continuum, and the plasticity of both their physical attributes and their population structure makes the domestic relationship difficult to identify. Intentional burial of animals or co-burial of animals with people (17, 18) also imply a domestic relationship, but these occurrences are relatively uncommon, and there is no reason to believe that people could not bury or be buried with totally wild animals. Quantitative age and sex profiles of archaeological fauna provide sound evidence for human harvesting, interference, and management of animal populations (19–21). These demographic patterns precede the phenotypic and genetic markers of domestication and track the early construction of the domestic niche. But this, too, has its limitations as it can be difficult to distinguish mutual benefit from intensive predation.

Last, mutual dependence can be established from dietary patterns, and stable isotope chemistry has been used to establish mutualisms between various combinations of people, plants, pigs, and dogs (22–28). Yet none of these studies evaluate the change in diet during the initial formation of the domestic niche.

**The Evidence for Domestication in China.** Humans in the Yangzi Drainage may have harvested wild rice (*Oryza* sp.) as early as 12,000 BP (29) but the earliest morphological evidence for its domestication varies in age from 10,000 to 6,000 BP (5, 29–32). The issue is unresolved, but we know far more about rice in the south than we do about millets in the north. The best data allude to domestic forms of broomcorn millet (*Panicum* sp.) and foxtail millet (*Setaria* sp.) by ≈7700 BP at Xinglonggou in the far northeast (33), broomcorn millet between 7900 and 7500 BP at Dadiwan on the western Loess Plateau (34–36), and both millets and rice at Yuezhuan along the lower reaches of the Yellow River by 8000 BP (37). The evidence for millet domestication in China is entirely based on the morphology of carbonized seeds.

Documenting domestication is also problematic for pigs (38, 39) and dogs (17, 40). Genetic data suggest pigs were domesticated independently in China (41) and a combination of morphological and demographic data suggest domestication by 8500–8000 BP at Cishan north of the Yellow River (42). Other early claims for pig domestication are unconfirmed but could represent multiple independent processes over a very large area (43, 44). The mere presence of *Canis* sp. bone suggests domestication at Nanzhuangtou between 12,000 and 10,700 BP (45), and at several sites throughout the Yellow River drainage, 8,000–7,000 BP (43, 46). Yet the strength of the relationship between humans and dogs has not been demonstrated for any of these places because it is difficult to infer from skeletal morphology alone. Although the deliberate burial of dogs in Siberia by ≈10,600 BP (17) suggests a long history of human–dog mutualism in northeast Asia, the earliest dog burials in northern China appear during the Yangshao Neolithic (34), well after agricultural expansion. During this time pig mandibles also become a common feature of human interments in northern China (47).

**Explanation of Radiocarbon Dating at Dadiwan.** The radiocarbon dates contributing to Fig. 4 and appearing in Table S3 are the product of several different research programs beginning with

the earliest excavations at Dadiwan in 1978 (34, 48–51). Shortcomings in these original data include inconsistent reporting of dates from the early excavation, and incomplete information (such as laboratory numbers, dating material, etc.). We view these shortcomings as inconsequential here, primarily because Fig. 4 is merely a succinct way to illustrate archaeological interpretations with radiocarbon data. The summed probability distribution of all calibrated radiocarbon dates reported from Dadiwan, compiled with the CalPal software package (52) and the INTCAL04 calibration curve (53) illustrates abundance and preservation of charcoal from different time periods, a method repeatedly used to infer occupation intensity (53, 54) and population change (55) through time. Although taphonomy and sampling surely compromise the efficacy of this method for reconstructing prehistoric demography (56), we suggest its use here is sound. The 81 Holocene radiocarbon dates presented here come from nearly 14,800 m<sup>2</sup> of excavation. If anything, the later portion of the phase 2 occupation of the site is underrepresented in this distribution of radiocarbon dates thereby reflecting a sampling strategy that biases the earlier, more cryptic occupation. Furthermore, local environmental proxies (57–59) provide no indication of Holocene depositional regimes that might favor preservation of one cultural horizon over another. The summed probability distribution is provided here as an illustration of occupation intensity and should not be misinterpreted as a rigorous presentation of population history.

Unique to the isotopic data reported here are the radiocarbon estimates on human and animal bone. Bone samples were selected from collections at the Gansu Museum (all excavations between 1978 and 1984) (34, 35, 60–62), and Lanzhou University (for excavations of 2004 and 2006) (50, 51), all of which had cultural affiliations assigned by the excavators. The vast majority of the original cultural affiliations were determined by stratigraphic position and/or association with pottery. In several cases, direct dates on bone from the present study point to errors in the original cultural assignments, implying stratigraphic mixing, interpretive error, or fundamental problems with the cultural sequence. For this study, direct radiocarbon dates on bone were used to assign samples to either phase 1 or phase 2. Where direct dates were not available, the original cultural affiliation was used.

Phase 1 and Phase 2 designations for this study should not be confused with the stratigraphic age sequence derived from the original excavations at Dadiwan (34, 35): Dadiwan I (Dadiwan, Laoguantai, or pre-Yangshao, 7800–7300 calBP), Dadiwan II (Late Banpo or Early Yangshao, 6500–5900 calBP), Dadiwan III (Miaodigou or Middle Yangshao, 5900–5500 calBP), Dadiwan IV (Late Yangshao, 5500–4900 calBP), and Dadiwan V (Lower Changshan 4900–4800 calBP). Although we did sample one pig (LM-104) dating to the Lower Changshan (assigned originally to Late Yangshao), our analysis does not address this period. Instead, our study compares samples from the phase 1 pre-Yangshao culture (which includes Dadiwan I), to those of the phase 2 Yangshao culture (which includes Dadiwan II, III, and IV). The purpose of this 2-part division was to evaluate change in subsistence systems during the time when agriculture is thought to evolve and spread. Because of the new, calibrated, direct dates on human and animal bone provided by this study, calendar ages for the 2 phases reported here differ slightly from the determinations published elsewhere (34, 35): including 2 $\sigma$  ranges, phase 1 now dates from 7950–7160 (ca. 7900–7200 calBP); phase 2 from 6470–4890 (ca. 6500–4900 calBP).

Several points emerge from the revised dating presented here. First, although we do find a single, isotopically domestic dog (LM-096) predating the earliest recorded Yangshao presence at Dadiwan (CAMS 134426, 6471–6315 calBP 2 $\sigma$ ), very few radiocarbon dates from the site fall within this interval. This may represent an isolated, short-term occupation of the Dadiwan site by mobile hunter-gatherers, quite similar to those during phase 1. Second, although the excavators assigned many of the faunal remains tested here to the Late Banpo phase, most were in fact much younger. Together, these points suggest that the site was little occupied during the time of the Late Banpo florescence further east, but was instead occupied later as the bearers of this tradition moved west. It seems that the Late Banpo (or early Yangshao) tradition manifests later and persists longer at the Dadiwan site than it does in the east at sites like Beishouling, Jiangzhai, or Banpo itself. The full complement of direct dates on domesticated dog (LM-087, CAMS 134425), pig (LM-038, CAMS 134371) and millet (CAMS 128457) does not appear at Dadiwan until  $\approx$ 5800 calBP. Although it is possible all of these domesticates were present at Dadiwan during the early years of phase 2, the radiocarbon distribution suggests otherwise.

- Rindos D (1984) *The Origins of Agriculture: An Evolutionary Perspective* (Academic, Orlando, FL).
- Harlan JR, de Wet JMJ, Price EG (1973) Comparative evolution of cereals. *Evolution* 27:311–325.
- Price EO (1984) Behavioral aspects of animal domestication. *Q Rev Biol* 59:1–33.
- Leach HM (2003) Human domestication reconsidered. *Curr Anthropol* 44:349–368.
- Fuller DQ, Harvey E, Qin L (2007) Presumed domestication? Evidence for wild rice cultivation and domestication in the fifth millennium BC of the Lower Yangtze region. *Antiquity* 81:316–331.
- Fuller DQ (2007) Contrasting patterns in crop domestication and domestication rates: recent archaeobotanical insights from the Old World. *Ann Bot* 100:903–924.
- Hillman GC, Davies MS (1990) Measured domestication rates in wild wheats and barley under primitive cultivation, and their archaeological implications. *J World Prehistory* 4:157.
- Trut LN (1999) Early canid domestication: The fox-farm experiment. *Am Sci* 87:160–169.
- Ladizinsky G (1987) Pulse domestication before cultivation. *Econ Bot* 41:60–65.
- Blumler MA, Byrne R (1991) The ecological genetics of domestication and the origins of agriculture. *Curr Anthropol* 32:23–54.
- Gepts P (2004) Crop domestication as a long-term selection experiment. *Plant Breeding Rev* 24:1–44.
- Harlan JR (1992) *Crops and Man* (American Society of Agronomy, Crop Science Society of America, Madison, WI).
- Harlan JR, de Wet JMJ (1965) Some thoughts about weeds. *Econ Bot* 19:16–24.
- Renfrew JM (1973) *Palaeoethnobotany: The Prehistoric Food Plants of the Near East and Europe* (Columbia Univ Press, New York).
- Emshwiller E (2006) in *Documenting Domestication: New Genetic and Archaeological Paradigms*, eds Zeder MA, Bradley DG, Emshwiller E, Smith BD (Univ California Press, Berkeley), pp 99–122.
- Zeder MA (2006) in *Documenting Domestication: New Genetic and Archaeological Paradigms*, eds Zeder MA, Bradley DG, Emshwiller E, Smith BD (Univ California Press, Berkeley), pp 171–180.
- Morey DF (2006) Burying key evidence: The social bond between dogs and people. *J Archaeol Sci* 33:158–175.
- Vigne J-D, Guilaine J, Debue K, Haye L, Gérard P (2004) Early taming of the cat in Cyprus. *Science* 9:259.
- Zeder MA, Hesse B (2000) The initial domestication of goats (*Capra hircus*) in the Zagros Mountains 10,000 years ago. *Science* 287:2254–2257.
- Zeder MA (2006) in *Documenting Domestication: New Genetic and Archaeological Paradigms*, eds Zeder MA, Bradley DG, Emshwiller E, Smith BD (Univ California Press, Berkeley), pp 181–208.
- Whitaker AR (2008) Incipient aquaculture in prehistoric California?: Long-term productivity and sustainability vs. immediate returns for the harvest of marine invertebrates. *J Archaeol Sci* 35:1114–1123.
- Coltrain JB, Leavitt SW (2002) Climate and diet in Fremont prehistory: Economic variability and abandonment of maize agriculture in the Great Salt Lake Basin. *Am Antiquity* 67:453–485.
- Pechenkina EA, Ambrose SH, Ma X, Benfer Jr. RA (2005) Reconstructing northern Chinese Neolithic subsistence practices by isotopic analysis. *J Archaeol Sci* 32:1176–1189.
- Minagawa M, Matsui A, Ishiguro N (2005) Patterns of prehistoric boar *Sus scrofa* domestication, and inter-island pig trading across the East China Sea, as determined by carbon and nitrogen isotope analysis. *Chem Geol* 218:91–102.
- Hogue SH (2003) Corn dogs and hush puppies: diet and domestication at two proto-historic farmsteads in Oktibbeha County, Mississippi. *Southeastern Archaeol* 22:185–195.
- Noe-Nygaard N (1988) <sup>13</sup>C values of dog bones reveal the nature of changes in man's food resources at the Mesolithic-Neolithic transition, Denmark. *Chem Geol* 73:87–96.
- van der Merwe NJ, Vogel JC (1977) Isotopic evidence for early maize cultivation in New York state. *Am Antiquity* 42:238–242.
- Burger RL, van der Merwe NJ (1990) Maize and the origins of highland Chavin civilization: An isotopic perspective. *Am Anthropol* 92:85–95.

29. Zhao Z (1998) The Middle Yangtze region in China is one place where rice was domesticated: Phytolith evidence from the Diaotonghuan Cave, Northern Jiangxi. *Antiquity* 72:885–897.
30. Jiang L, Liu L (2006) New evidence for the origins of sedentism and rice domestication in the Lower Yangzi River, China. *Antiquity* 80:355–361.
31. Crawford G, Shen C (1998) The origins of rice agriculture: Recent progress in East Asia. *Antiquity* 72:858–866.
32. Zong Y, et al. (2007) Fire and flood management of coastal swamp enabled first rice paddy cultivation in east China. *Nature* 449:459–462.
33. Zhao Z (2005) Zhiwu kaoguxue jiqi xin jinzhan (Recent progress in Chinese archaeobotany). *Kaogu (Archaeology)* 7:42–49.
34. GPICRA (2006) *Qin'an Dadiwan xinshiqi shi dai yizhi fa jue baogao (Dadiwan in Qin'an: report on excavations at a Neolithic site)* (Cultural Relics Publishing House, Beijing).
35. Lang S (2003) Gansu Qin'an dadiwan yizhi juluo xingtai ji qi yanbian (Settlement pattern of the Dadiwan site in Qin'an County, Gansu, and its evolution). *Kaogu (Archaeology)* 6:83–89.
36. Liu CZ, Kong ZC, Lang SD (2004) Dadiwan yizhi nongye zhiwu yicun yu renli shengcun de huanjing tantao (Plant remains at the Dadiwan site and a discussion of human adaptation to the environment). *Zhongyuan Wenwu (Archaeology of Central China)* 4:26–30.
37. Crawford GW, Chen X, Wang J (2006) Shan dong ji nan chang qing qu yu zhuang yi zhi fa xian hou li wen hua shi qi de tan hua dao (Houli culture rice from the Yuezhuang site, Jinan). *Dong Fang Kao Gu (East Asia Archaeology)* 3:247–251.
38. Albarella U, Dobney K, Rowley-Conwy P (2006) in *Documenting Domestication: New Genetic and Archaeological Paradigms*, eds Zeder MA, Bradley DG, Emshwiller E, Smith BD (Univ California Press, Berkeley), pp 209–227.
39. Rowley-Conwy P (1995) Wild or domestic? On the evidence for the earliest domestic cattle and pigs in South Scandinavia and Iberia. *Int J Osteoarchaeol* 5:115–126.
40. Olsen SJ (1979) in *Advances in Archaeological Method and Theory 2*, ed Schiffer MB (Academic, New York), pp 175–197.
41. Larson G, et al. (2005) Worldwide phylogeography of wild boar reveals multiple centers of pig domestication. *Science* 307:1618–1621.
42. Yuan J, Flad RK (2002) Pig domestication in ancient China. *Antiquity* 76:724–732.
43. Flad RK, Yuan J, Li S (2007) in *Late Quaternary Climate Change and Human Adaptation in Arid China*, eds Madsen DB, Gao X, Chen FH (Elsevier, Amsterdam), pp 167–203.
44. Ho PT (1977) in *Origins of Agriculture*, ed Reed CA (Mouton, The Hague), pp 413–484.
45. Jin J, Xu H (1992) Qianyi Xushui Nanzhuangtou Xinshiqi Shidai Zoaqi Yicun (Opinions on the early Neolithic site of Nanzhuangtou at Xushui). *Kaogu (Archaeology)* 11:1018–1022.
46. Underhill AP (1997) Current issues in Chinese Neolithic archaeology. *J World Prehistory* 11:103–160.
47. Kim S-O (1994) Burials, pigs, and political prestige in Neolithic China. *Curr Anthropol* 35:119–141.
48. IA-CASS (1991) *Zhongguo Kaoguxue zhong Tanshisi Niandai Shujuji 1965–1991 (Radiocarbon Dates in Chinese Archaeology, 1965–1991)* (Cultural Relics Publishing House, Beijing).
49. Lu TLD (1999) *The Transition from Foraging to Farming and the Origin of Agriculture in China* (British Archaeological Reports, Oxford, UK).
50. Bettinger RL, Barton L, Brantingham PJ, Elston RG (2005) Report on 2004 Archaeological Fieldwork at the Dadiwan Site, Shao Dian Village, Gansu Province, PRC. (Pacific Rim Research Program).
51. Barton L (2009) Early food production in China's Western Loess Plateau. PhD thesis (University of California, Davis).
52. Weninger B, Jöris O, Danzeglocke U (2007) *Cologne Radiocarbon Calibration and Paleoclimate Research Package* (University of Cologne, Cologne, Germany).
53. Reimer PJ, et al. (2004) INTCAL04 terrestrial radiocarbon age calibration, 0–26 KYR BP. *Radiocarbon* 46:1029–1058.
54. Barton L, Brantingham PJ, Ji DX (2007) in *Late Quaternary Climate Change and Human Adaptation in Arid China*, eds Madsen DB, Gao X, Chen FH (Elsevier, Amsterdam), pp 105–128.
55. Gamble C, Davies W, Pettitt P, Hazelwood L, Richards M (2005) The archaeological and genetic foundations of the European population during the Late Glacial: Implications for agricultural thinking. *Cambridge Archaeol J* 15:193–223.
56. Surovell TA, Brantingham PJ (2007) A note on the use of temporal frequency distributions in studies of prehistoric demography. *J Archaeol Sci* 34:1868–1877.
57. Feng Z, An C, Tang L, Jull TA (2004) Stratigraphic evidence of a Megahumid climate between 10,000 and 4000 years B.P. in the western part of the Chinese Loess Plateau. *Global Planetary Change* 43:145–155.
58. Feng ZD, Tang L, Wang HB, Ma YZ, Liu KB (2006) Holocene vegetation variations and the associated environmental changes in the western part of the Chinese Loess Plateau. *Palaeogeogr Palaeoclimatol Palaeoecol* 241:440–456.
59. An C, Feng Z, Tang L (2004) Environmental change and cultural response between 8000 and 4000 cal. yr BP in the western Loess Plateau, northwest China. *J Quaternary Sci* 19:529–535.
60. GPICRA (2003) Gansu Qin'an dadiwan yizhi yangsho wenhua zaoqi juluo fajue jianbao (Excavation of the settlement of early Yangshao culture on the Dadiwan site in Qin'an County, Gansu). *Kaogu (Archaeology)* 6:19–31.
61. CPAM and Dadiwan Excavation Group (1982) Qin'an Dadiwan 1980 nian fajue jianbao (A brief report on the excavation of Dadiwan in Qin'an during the 1980 season). *Kaogu yu Wenwu (Archaeology and Relics)* 2:1–8.
62. CPAM, Provincial Museum of Gansu, and Dadiwan Excavation Group (1981) Gansu Qin'an Dadiwan xinshiqi shidai jiaoqi yizhi (Early Neolithic remains at Dadiwan, Qin'an Xian, Gansu). *Wenwu (Cultural Relics)* 4:1–8.

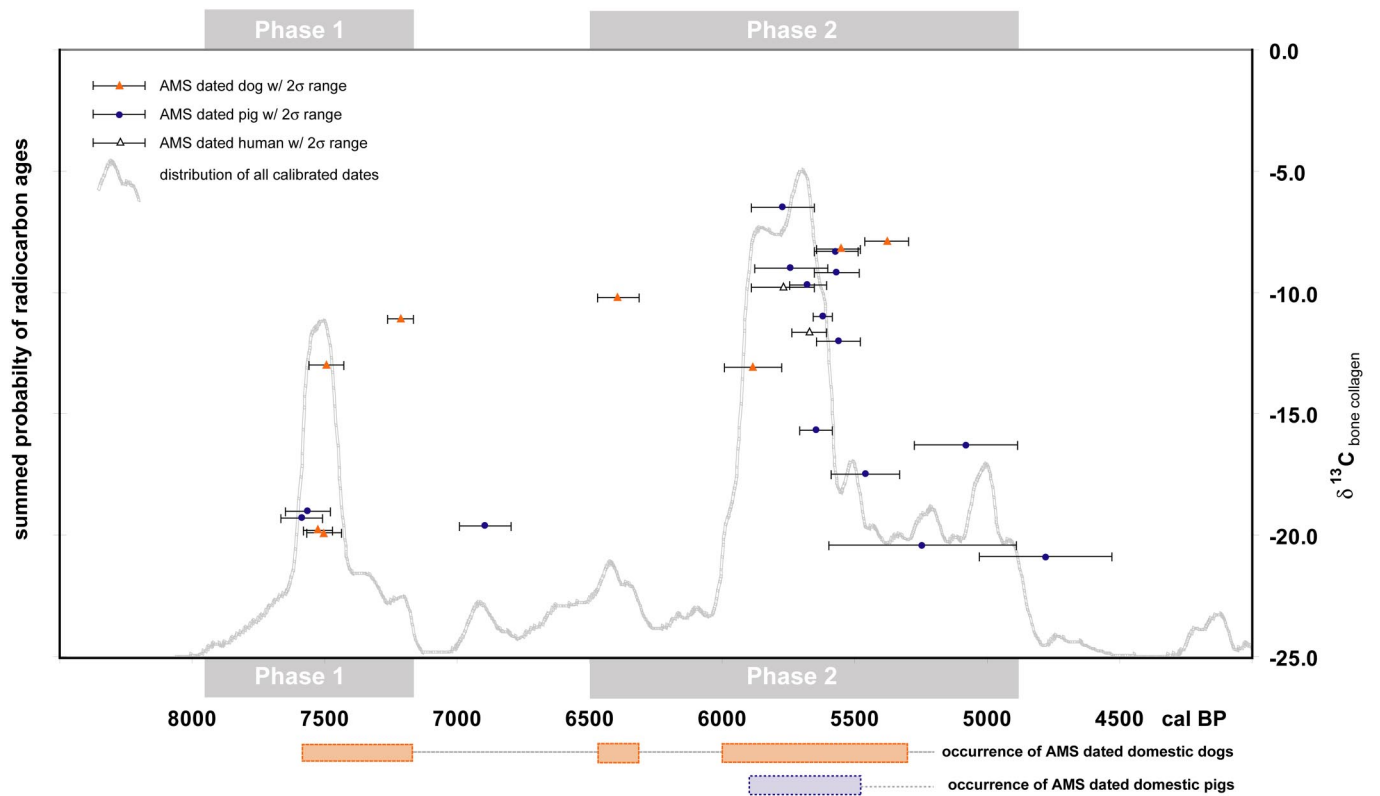

**Fig. S1.** A radiocarbon chronology of domestication at the Dadiwan site. Here, dated samples and their 2σ calibrated ranges are plotted against their associated δ<sup>13</sup>C values (right y axis), and superimposed on the summed probability distribution of all calibrated radiocarbon dates from the Dadiwan site (left y axis).

**Table S1. Complete listing of samples (n = 74), taxonomic identifications, cultural affiliations and isotopic data**

| MS-ID  | Taxon                  | prov      | exPhase | <sup>14</sup> C | anPhase | [C]   | [N]   | C/N  | δ <sup>13</sup> C <sub>col</sub> | δ <sup>15</sup> N <sub>col</sub> |
|--------|------------------------|-----------|---------|-----------------|---------|-------|-------|------|----------------------------------|----------------------------------|
| LM-003 | Homo sapiens           | M311      | LYS     |                 | 2       | 47.57 | 17.67 | 2.69 | -6.6                             | 9.5                              |
| LM-004 | Homo sapiens           | M701      | LYS     |                 | 2       | 46.02 | 17.25 | 2.67 | -6.5                             | 10.4                             |
| LM-005 | Homo sapiens           | M318      | LYS     |                 | 2       | 47.98 | 17.80 | 2.70 | -14.2                            | 10.8                             |
| LM-010 | Homo sapiens           | H5-A37    | LBP     |                 | 2       | 48.69 | 17.34 | 2.81 | -10.0                            | 8.7                              |
| LM-011 | Homo sapiens           | H235-A137 | LBP     | *               | 2       | 46.58 | 16.91 | 2.75 | -9.8                             | 9.1                              |
| LM-012 | Homo sapiens           | H235-A1   | LBP     | *               | 2       | 47.41 | 17.11 | 2.77 | -11.6                            | 9.8                              |
| LM-020 | deer (Moschus)         | F229-157  | LBP     |                 | 2       | 48.88 | 17.62 | 2.77 | -20.8                            | 5.8                              |
| LM-021 | deer (Moschus)         | F203      | LBP     |                 | 2       | 46.58 | 16.91 | 2.76 | -20.9                            | 4.6                              |
| LM-023 | deer (Moschus)         | F229-152  | LBP     |                 | 2       | 42.78 | 14.26 | 2.81 | -21.1                            | 6.9                              |
| LM-024 | deer (Moschus)         | F229-33   | LBP     |                 | 2       | 45.94 | 16.81 | 2.73 | -20.2                            | 5.6                              |
| LM-025 | Canis                  | F361-A3   | LBP     | *               | 2       | 50.20 | 18.14 | 2.77 | -7.9                             | 7.9                              |
| LM-026 | Canis                  | F219-A2   | LBP     | *               | 2       | 43.52 | 15.85 | 2.75 | -8.2                             | 8.6                              |
| LM-027 | Canis                  | F337-A10  | LBP     |                 | 2       | 44.83 | 16.37 | 2.74 | -10.7                            | 8.7                              |
| LM-028 | Sus                    | H205-A43  | LBP     |                 | 2       | 48.40 | 17.50 | 2.77 | -8.5                             | 8.0                              |
| LM-029 | Sus                    | F347-A3   | LBP     | *               | 2       | 45.24 | 16.22 | 2.79 | -15.7                            | 7.2                              |
| LM-030 | Sus                    | H325-A78  | LBP     |                 | 2       | 49.77 | 18.16 | 2.74 | -8.3                             | 8.4                              |
| LM-031 | Sus                    | H345-A1   | LBP     |                 | 2       | 48.80 | 17.94 | 2.72 | -14.7                            | 8.5                              |
| LM-032 | Sus                    | F223-A1   | LBP     | *               | 2       | 45.11 | 17.01 | 2.65 | -17.5                            | 6.4                              |
| LM-033 | Sus                    | H259-A6   | LBP     |                 | 2       | 49.01 | 17.80 | 2.75 | -7.0                             | 7.7                              |
| LM-034 | Sus                    | F347-A7   | LBP     | *               | 2       | 43.35 | 15.84 | 2.74 | -9.7                             | 9.2                              |
| LM-035 | Sus                    | H211-A66  | LBP     |                 | 2       | 49.38 | 18.04 | 2.74 | -9.0                             | 9.2                              |
| LM-036 | Sus                    | F361-A6   | LBP     |                 | 2       | 49.07 | 17.94 | 2.74 | -10.0                            | 8.8                              |
| LM-037 | Sus                    | H73-A1    | LBP     |                 | 2       | 47.32 | 16.69 | 2.83 | -6.3                             | 8.1                              |
| LM-038 | Sus                    | F250-A35  | LBP     | *               | 2       | 46.06 | 16.92 | 2.72 | -6.5                             | 8.6                              |
| LM-039 | Sus                    | H211-A46  | LBP     |                 | 2       | 50.19 | 18.28 | 2.74 | -8.8                             | 8.4                              |
| LM-041 | Sus                    | H211-A62  | LBP     |                 | 2       | 47.94 | 17.15 | 2.79 | -11.5                            | 9.9                              |
| LM-042 | Sus                    | H211-A68  | LBP     |                 | 2       | 48.42 | 17.60 | 2.75 | -12.2                            | 8.9                              |
| LM-043 | Sus                    | F246-A12  | LBP     |                 | 2       | 41.56 | 14.07 | 2.95 | -9.1                             | 9.1                              |
| LM-044 | Sus                    | H211-A14  | LBP     |                 | 2       | 49.54 | 18.07 | 2.74 | -11.4                            | 9.6                              |
| LM-045 | Sus                    | F361-A7   | LBP     | *               | 2       | 36.04 | 12.79 | 2.82 | -9.2                             | 8.8                              |
| LM-046 | Sus                    | F218-A2   | LBP     |                 | 2       | 45.74 | 16.57 | 2.76 | -8.2                             | 9.1                              |
| LM-047 | Sus                    | F222-A29  | LBP     | *               | 2       | 28.77 | 9.95  | 2.89 | -8.3                             | 8.7                              |
| LM-048 | Sus                    | H211-A67  | LBP     |                 | 2       | 45.44 | 16.50 | 2.75 | -14.9                            | 6.8                              |
| LM-049 | Sus                    | F250-A26  | LBP     |                 | 2       | 44.10 | 16.08 | 2.74 | -9.0                             | 8.4                              |
| LM-053 | Bos                    | H398-A290 | LBP     |                 | 2       | 28.62 | 9.32  | 3.07 | -19.9                            | 8.0                              |
| LM-058 | deer (Cervus)          | F250-A34  | LBP     |                 | 2       | 45.08 | 16.85 | 2.68 | -21.0                            | 6.4                              |
| LM-060 | deer (Cervus)          | F250-A11  | LBP     |                 | 2       | 44.58 | 16.32 | 2.73 | -21.0                            | 7.8                              |
| LM-062 | Bos                    | H3100-A10 | LBP     |                 | 2       | 45.61 | 16.90 | 2.70 | -22.1                            | 8.1                              |
| LM-063 | Sus                    | F382-A28  | LBP     | *               | 2       | 44.30 | 16.11 | 2.75 | -9.0                             | 8.6                              |
| LM-064 | Sus                    | H5-A27    | LBP     |                 | 2       | 50.16 | 18.17 | 2.76 | -7.7                             | 7.9                              |
| LM-065 | Sus                    | H709-A8   | LBP     |                 | 2       | 45.94 | 16.35 | 2.81 | -8.3                             | 8.9                              |
| LM-066 | Sus                    | T347-A4   | LBP     |                 | 2       | 47.39 | 17.12 | 2.77 | -9.0                             | 8.2                              |
| LM-067 | Sus                    | F229-19   | LBP     | *               | 2       | 44.84 | 16.63 | 2.70 | -11.0                            | 7.8                              |
| LM-068 | Sus                    | H253-A12  | LBP     |                 | 2       | 48.60 | 17.35 | 2.80 | -12.3                            | 9.3                              |
| LM-069 | deer (Cervus)          | H363-A3   | DDW     |                 | 1       | 41.88 | 14.90 | 2.81 | -20.2                            | 7.1                              |
| LM-070 | deer (Cervus)          | H254-A2   | DDW     |                 | 1       | 40.40 | 14.67 | 2.75 | -19.4                            | 6.2                              |
| LM-075 | deer (Cervus)          | F310-A3   | LBP     |                 | 2       | 46.39 | 16.87 | 2.75 | -18.9                            | 5.6                              |
| LM-076 | deer (Cervus)          | H3114-A10 | DDW     |                 | 1       | 42.76 | 15.68 | 2.73 | -20.0                            | 8.1                              |
| LM-078 | deer (Cervus)          | H363-A30  | DDW     |                 | 1       | 38.86 | 14.48 | 2.68 | -20.7                            | 7.3                              |
| LM-081 | Canis                  | H398-A127 | DDW     | *               | 1       | 48.50 | 17.54 | 2.77 | -19.9                            | 6.2                              |
| LM-082 | Canis                  | H398-A377 | DDW     | *               | 1       | 46.44 | 17.10 | 2.72 | -19.8                            | 5.9                              |
| LM-083 | Canis                  | F103-17   | LBP     |                 | 2       | 39.25 | 14.17 | 2.77 | -9.3                             | 9.0                              |
| LM-084 | Canis                  | H398-A271 | DDW     |                 | 1       | 43.58 | 16.25 | 2.68 | -10.2                            | 7.3                              |
| LM-085 | Ursus                  | H398-A310 | DDW     |                 | 1       | 42.11 | 15.11 | 2.79 | -17.3                            | 7.0                              |
| LM-086 | Canis                  | M224-A1   | LBP     | *               | 1       | 45.45 | 16.24 | 2.80 | -13.0                            | 8.6                              |
| LM-087 | Canis                  | M224-A1   | LBP     | *               | 2       | 44.08 | 15.77 | 2.79 | -13.1                            | 8.7                              |
| LM-089 | Bird (possibly Gallus) | H398-A115 | DDW     |                 | 1       | 43.37 | 15.90 | 2.73 | -15.6                            | 7.4                              |
| LM-090 | Bird (possibly Gallus) | F371-A11  | DDW     |                 | 1       | 44.60 | 16.37 | 2.72 | -16.8                            | 7.4                              |
| LM-091 | Bird (possibly Gallus) | H393-A93  | LBP     |                 | 2       | 44.73 | 16.27 | 2.75 | -16.2                            | 7.1                              |
| LM-092 | Bird (possibly Gallus) | H227-A140 | LBP     |                 | 2       | 43.09 | 15.84 | 2.72 | -17.6                            | 6.3                              |
| LM-093 | Bird (possibly Gallus) | H227-A52  | LBP     |                 | 2       | 41.65 | 15.18 | 2.75 | -14.2                            | 5.9                              |
| LM-094 | Bird (possibly Gallus) | H227-A50  | LBP     |                 | 2       | 43.71 | 15.87 | 2.76 | -17.2                            | 5.7                              |
| LM-095 | Bird (possibly Gallus) | H227-A53  | LBP     |                 | 2       | 43.88 | 15.71 | 2.79 | -16.2                            | 6.5                              |
| LM-096 | Canis                  | H398-A273 | DDW     | *               | 2       | 44.38 | 16.14 | 2.75 | -10.2                            | 7.5                              |

| MS-ID  | Taxon | prov       | exPhase | <sup>14</sup> C | anPhase | [C]   | [N]   | C/N  | δ <sup>13</sup> C <sub>col</sub> | δ <sup>15</sup> N <sub>col</sub> |
|--------|-------|------------|---------|-----------------|---------|-------|-------|------|----------------------------------|----------------------------------|
| LM-097 | Canis | H398-A275  | DDW     | *               | 1       | 41.88 | 15.36 | 2.73 | -11.1                            | 7.7                              |
| LM-099 | Sus   | H398-A4    | DDW     | *               | 2       | 45.51 | 16.46 | 2.77 | -12.0                            | 8.3                              |
| LM-101 | Sus   | H359-A1    | DDW     | *               | 2       | 40.82 | 14.26 | 2.86 | -16.3                            | 6.2                              |
| LM-103 | Sus   | H363-A66   | DDW     | *               | 2       | 44.74 | 15.73 | 2.84 | -20.4                            | 5.6                              |
| LM-104 | Sus   | H359-A12   | DDW     | *               | 2       | 42.88 | 14.72 | 2.91 | -20.9                            | 7.2                              |
| LM-106 | Sus   | uncertain  | NA      | *               | 1       | 43.76 | 15.39 | 2.84 | -19.6                            | 5.2                              |
| LM-107 | Sus   | H363-A43   | DDW     | *               | 1       | 46.16 | 16.37 | 2.82 | -19.3                            | 5.3                              |
| LM-108 | Sus   | H398-A215  | DDW     |                 | 1       | 44.06 | 15.95 | 2.76 | -19.1                            | 7.0                              |
| LM-109 | Sus   | H398-A147  | DDW     | *               | 1       | 44.05 | 15.71 | 2.80 | -19.0                            | 5.6                              |
| LM-117 | Sus   | DDW02 4.2B | LBP     |                 | 2       | 48.54 | 17.45 | 2.78 | -8.3                             | 7.6                              |

The archaeological provenience (prov) of each sample is recorded in curatorial lots from the Gansu Museum or Lanzhou University. Because the original excavators determined the cultural affiliation of each provenience (exPhase), each sample can be assigned to a cultural tradition, and therefore has an approximate age range. However the radiocarbon results (SI Table 2) occasionally required that these affiliations be changed. The phases used for the analysis and interpretations (anPhase) reflect these changes. Asterisks identify samples dated directly by radiocarbon accelerator mass spectrometry.

**Table S2. New AMS radiocarbon dates on bone collagen from the Dadiwan site**

| Lab no.      | prov      | MS ID  | rcybp | +/- | 2 $\sigma$ mid | 2 $\sigma$ + | 2 $\sigma$ - |
|--------------|-----------|--------|-------|-----|----------------|--------------|--------------|
| CAMS 134454* | M102      | LM-001 | 1035  | 35  | 943            | 1055         | 832          |
| CAMS 134455* | F14-A18   | LM-009 | 4950  | 30  | 5670           | 5736         | 5605         |
| CAMS 134456  | H235-A137 | LM-011 | 5010  | 35  | 5773           | 5892         | 5655         |
| CAMS 134457  | H235-A1   | LM-012 | 4950  | 30  | 5670           | 5736         | 5605         |
| CAMS 134458* | DDW05     | LM-013 | 4955  | 40  | 5726           | 5855         | 5598         |
| CAMS 134366  | F361-A3   | LM-025 | 4620  | 30  | 5379           | 5462         | 5297         |
| CAMS 134367  | F219-A2   | LM-026 | 4835  | 30  | 5561           | 5644         | 5478         |
| CAMS 134368  | F347-A3   | LM-029 | 4895  | 30  | 5646           | 5706         | 5586         |
| CAMS 134369  | F223-A1   | LM-032 | 4760  | 35  | 5460           | 5589         | 5330         |
| CAMS 134370  | F347-A7   | LM-034 | 4965  | 30  | 5677           | 5747         | 5608         |
| CAMS 134371  | F250-A35  | LM-038 | 5010  | 35  | 5773           | 5892         | 5655         |
| CAMS 134372  | F361-A7   | LM-045 | 4850  | 30  | 5568           | 5652         | 5485         |
| CAMS 134373  | F222-A29  | LM-047 | 4855  | 30  | 5570           | 5654         | 5486         |
| CAMS 134420  | F382-A28  | LM-063 | 4970  | 40  | 5741           | 5879         | 5603         |
| CAMS 134421  | F229-19   | LM-067 | 4875  | 30  | 5621           | 5657         | 5585         |
| CAMS 134422  | H398-A127 | LM-081 | 6615  | 35  | 7503           | 7569         | 7438         |
| CAMS 134423  | H398-A377 | LM-082 | 6645  | 30  | 7524           | 7579         | 7470         |
| CAMS 134424  | M224-A1   | LM-086 | 6580  | 30  | 7495           | 7560         | 7429         |
| CAMS 134425  | M224-A1   | LM-087 | 5165  | 30  | 5884           | 5993         | 5775         |
| CAMS 134426  | H398-A273 | LM-096 | 5625  | 30  | 6393           | 6471         | 6315         |
| CAMS 134427  | H398-A275 | LM-097 | 6280  | 30  | 7214           | 7264         | 7164         |
| CAMS 134446  | H398-A4   | LM-099 | 4835  | 30  | 5561           | 5644         | 5478         |
| CAMS 134447  | H359-A1   | LM-101 | 4440  | 25  | 5081           | 5278         | 4885         |
| CAMS 134448* | H363-A50  | LM-102 | 6390  | 30  | 7342           | 7418         | 7265         |
| CAMS 134449  | H363-A66  | LM-103 | 4620  | 130 | 5244           | 5598         | 4890         |
| CAMS 134450  | H359-A12  | LM-104 | 4240  | 80  | 4779           | 5029         | 4529         |
| CAMS 134451  | Uncertain | LM-106 | 6050  | 35  | 6894           | 6992         | 6795         |
| CAMS 134452  | H363-A43  | LM-107 | 6720  | 40  | 7587           | 7665         | 7509         |
| CAMS 134453  | H398-A147 | LM-109 | 6690  | 40  | 7565           | 7650         | 7479         |

The archaeological provenience (prov) corresponds to locations named during original excavations.  $\delta^{13}\text{C}$ -corrected radiocarbon ages (rcybp) are based on the 5568 Libby half-life. All calibrations are with OxCal 4.0 by using the INTCAL 04 calibration curve. Asterisks denote samples removed from the interpretations presented here, either because the dates are outside our range of interest, or because the stable isotope analysis returned flawed results or no results at all. The Mass Spectrometer IDs (MS ID) correspond to samples presented in [SI Table 1](#).

**Table S3. Complete list of known radiocarbon dates from the Dadiwan site**

| Lab no.     | Material          | prov         | MS ID  | rcybp | +/- | 2σ mid | 2σ + | 2σ - | Source/ref. |
|-------------|-------------------|--------------|--------|-------|-----|--------|------|------|-------------|
| CAMS 134454 | bone collagen     | M102         | LM-001 | 1035  | 35  | 943    | 1055 | 832  | This study  |
| CAMS 134379 | charcoal          | DDW03        |        | 3770  | 35  | 4117   | 4245 | 3990 | 50, 51      |
| CAMS 134450 | bone collagen     | H359-A12     | LM-104 | 4240  | 80  | 4779   | 5029 | 4529 | This study  |
| BK 84080    | charcoal          | F901         |        | 4392  | 100 | 5022   | 5315 | 4729 | 34          |
| BK 81050    | charcoal          | F405         |        | 4392  | 80  | 5064   | 5288 | 4841 | 34          |
| Beta 197628 | charcoal          | DDW02        |        | 4420  | 40  | 5072   | 5277 | 4867 | 50          |
| BK 84081    | charcoal          | F901         |        | 4421  | 100 | 5075   | 5313 | 4838 | 34          |
| CAMS 134447 | bone collagen     | H359-A1      | LM-101 | 4440  | 25  | 5081   | 5278 | 4885 | This study  |
| BK 93177    | ?                 | F902         |        | 4499  | 80  | 5155   | 5436 | 4875 | 34          |
| BK 81049    | charcoal          | F405         |        | 4538  | 80  | 5175   | 5464 | 4886 | 34          |
| WB 80-50    | charcoal          | H366         |        | 4557  | 200 | 5183   | 5717 | 4650 | 34          |
| CAMS 134449 | bone collagen     | H363-A66     | LM-103 | 4620  | 130 | 5244   | 5598 | 4890 | This study  |
| BK 84082    | charcoal          | F901         |        | 4606  | 100 | 5281   | 5584 | 4978 | 34          |
| CAMS 134366 | bone collagen     | F361-A3      | LM-025 | 4620  | 30  | 5379   | 5462 | 5297 | This study  |
| CAMS 134369 | bone collagen     | F223-A1      | LM-032 | 4760  | 35  | 5460   | 5589 | 5330 | This study  |
| BK 93180    | ?                 | F400         |        | 4757  | 85  | 5479   | 5644 | 5313 | 34          |
| WB 80-52    | ?                 | F17          |        | 4761  | 95  | 5504   | 5709 | 5300 | 34          |
| BK79027     | charcoal          | H202         |        | 4761  | 100 | 5508   | 5720 | 5296 | 34          |
| CAMS 134367 | bone collagen     | F219-A2      | LM-026 | 4835  | 30  | 5561   | 5644 | 5478 | This study  |
| CAMS 134446 | bone collagen     | H398-A4      | LM-099 | 4835  | 30  | 5561   | 5644 | 5478 | This study  |
| CAMS 134372 | bone collagen     | F361-A7      | LM-045 | 4850  | 30  | 5568   | 5652 | 5485 | This study  |
| CAMS 134373 | bone collagen     | F222-A29     | LM-047 | 4855  | 30  | 5570   | 5654 | 5486 | This study  |
| WB 80-51    | charcoal          | F330         |        | 4854  | 95  | 5602   | 5881 | 5324 | 34          |
| BK 93181    | ?                 | F411         |        | 4854  | 100 | 5604   | 5887 | 5322 | 34          |
| BK 93182    | ?                 | F709         |        | 4868  | 90  | 5607   | 5887 | 5327 | 34          |
| CAMS 134421 | bone collagen     | F229-19      | LM-067 | 4875  | 30  | 5621   | 5657 | 5585 | This study  |
| CAMS 134368 | bone collagen     | F347-A3      | LM-029 | 4895  | 30  | 5646   | 5706 | 5586 | This study  |
| CAMS 134455 | bone collagen     | F14-A18      | LM-009 | 4950  | 30  | 5670   | 5736 | 5605 | This study  |
| CAMS 134457 | bone collagen     | H235-A1      | LM-012 | 4950  | 30  | 5670   | 5736 | 5605 | This study  |
| CAMS 134370 | bone collagen     | F347-A7      | LM-034 | 4965  | 30  | 5677   | 5747 | 5608 | This study  |
| CAMS 134458 | bone collagen     | DDW05        | LM-013 | 4955  | 40  | 5726   | 5855 | 5598 | This study  |
| CAMS 128457 | charcoal          | JB1          |        | 4965  | 40  | 5738   | 5875 | 5601 | 50, 51      |
| CAMS 134420 | bone collagen     | F382-A28     | LM-063 | 4970  | 40  | 5741   | 5879 | 5603 | This study  |
| BK 93183    | ?                 | F229         |        | 4990  | 140 | 5751   | 6173 | 5330 | 34          |
| BK 79024    | charcoal          | H201:20      |        | 4995  | 90  | 5753   | 5915 | 5590 | 34          |
| WB 80-53    | charcoal          | F332         |        | 5000  | 90  | 5754   | 5917 | 5591 | 34          |
| CAMS 134456 | bone collagen     | H235-A137    | LM-011 | 5010  | 35  | 5773   | 5892 | 5655 | This study  |
| CAMS 134371 | bone collagen     | F250-A35     | LM-038 | 5010  | 35  | 5773   | 5892 | 5655 | This study  |
| CAMS 128452 | charcoal          | LY03         |        | 5030  | 35  | 5778   | 5895 | 5662 | 50, 51      |
| CAMS 128455 | charcoal          | DDW04        |        | 5040  | 35  | 5783   | 5902 | 5663 | 50, 51      |
| CAMS 128447 | charcoal          | DDW03        |        | 5080  | 40  | 5826   | 5915 | 5736 | 50, 51      |
| CAMS 127100 | charcoal          | DDW05        |        | 5080  | 30  | 5828   | 5910 | 5746 | 50,51       |
| CAMS 128456 | charcoal          | DDW04        |        | 5095  | 35  | 5832   | 5917 | 5747 | 50,51       |
| CAMS 128454 | charcoal          | DDW04        |        | 5105  | 35  | 5835   | 5921 | 5749 | 50, 51      |
| WB 80-32    | ?                 | F229         |        | 5097  | 85  | 5854   | 6095 | 5613 | 34          |
| CAMS 110291 | charcoal          | DDW02        |        | 5145  | 35  | 5871   | 5990 | 5753 | 50          |
| CAMS 134425 | bone collagen     | M224-A1      | LM-087 | 5165  | 30  | 5884   | 5993 | 5775 | This study  |
| BK 79028    | charcoal          | F400         |        | 5090  | 100 | 5888   | 6173 | 5602 | 34          |
| WB 80-54    | charcoal          | F232         |        | 5106  | 90  | 5894   | 6174 | 5615 | 34          |
| BK 93185    | ?                 | F246         |        | 5138  | 120 | 5901   | 6189 | 5614 | 34          |
| WB 80-30    | charcoal          | F17          |        | 5150  | 85  | 5921   | 6179 | 5664 | 34          |
| WB 80-31    | charcoal          | H227         |        | 5170  | 95  | 5926   | 6189 | 5664 | 34          |
| BK 79025    | charcoal          | Y202         |        | 5170  | 150 | 5947   | 6277 | 5616 | 34          |
| CAMS 110292 | charcoal          | DDW02        |        | 5195  | 40  | 6034   | 6174 | 5893 | 50          |
| BK 93176    | ?                 | F714         |        | 5374  | 160 | 6122   | 6491 | 5753 | 34          |
| ZK 0742     | charcoal          | Trench 301.2 |        | 5520  | 90  | 6261   | 6501 | 6020 | 34          |
| CAMS 134426 | bone collagen     | H398-A273    | LM-096 | 5625  | 30  | 6393   | 6471 | 6315 | This study  |
| BK 79029    | charcoal          | Y300         |        | 5620  | 80  | 6457   | 6630 | 6283 | 34          |
| ZK 2219     | plaster/ash paste | F405         |        | 5730  | 110 | 6539   | 6775 | 6302 | 48          |
| ZK 2220     | white ash         | F415         |        | 5780  | 85  | 6593   | 6785 | 6402 | 48          |
| BK 93178    | ?                 | F820         |        | 5860  | 150 | 6734   | 7152 | 6317 | 34          |
| CAMS 134451 | bone collagen     | ?            | LM-106 | 6050  | 35  | 6894   | 6992 | 6795 | This study  |
| CAMS 134427 | bone collagen     | H398-A275    | LM-097 | 6280  | 30  | 7214   | 7264 | 7164 | This study  |
| ?           | charcoal          | H363         |        | 6474  | 165 | 7336   | 7665 | 7007 | 49          |



| Lab no.     | Material      | prov      | MS ID  | rcybp | +/- | 2 $\sigma$ mid | 2 $\sigma$ + | 2 $\sigma$ - | Source/ref. |
|-------------|---------------|-----------|--------|-------|-----|----------------|--------------|--------------|-------------|
| CAMS 134448 | bone collagen | H363-A50  | LM-102 | 6390  | 30  | 7342           | 7418         | 7265         | This study  |
| CAMS 134375 | charcoal      | DDW03     |        | 6465  | 35  | 7371           | 7435         | 7308         | 50, 51      |
| BK 80007    | charcoal      | H363      |        | 6540  | 90  | 7428           | 7579         | 7277         | 34          |
| BK 81021    | charcoal      | H398      |        | 6579  | 80  | 7457           | 7592         | 7323         | 34          |
| CAMS 127099 | charcoal      | DDW04     |        | 6580  | 30  | 7495           | 7560         | 7429         | 50, 51      |
| CAMS 134424 | bone collagen | M224-A1   | LM-086 | 6580  | 30  | 7495           | 7560         | 7429         | This study  |
| CAMS 128453 | charcoal      | DDW04     |        | 6595  | 35  | 7498           | 7566         | 7431         | 50, 51      |
| CAMS 128450 | charcoal      | DDW04     |        | 6615  | 40  | 7503           | 7570         | 7436         | 50, 51      |
| CAMS 134422 | bone collagen | H398-A127 | LM-081 | 6615  | 35  | 7503           | 7569         | 7438         | This study  |
| Beta 197626 | charcoal      | DDW02     |        | 6650  | 40  | 7515           | 7587         | 7444         | 50          |
| CAMS 134423 | bone collagen | H398-A377 | LM-082 | 6645  | 30  | 7524           | 7579         | 7470         | This study  |
| CAMS 128451 | charcoal      | DDW04     |        | 6685  | 35  | 7550           | 7612         | 7489         | 50, 51      |
| BK 81024    | charcoal      | H397      |        | 6690  | 80  | 7553           | 7671         | 7435         | 34          |
| CAMS 134453 | bone collagen | H398-A147 | LM-109 | 6690  | 40  | 7565           | 7650         | 7479         | This study  |
| CAMS 134452 | bone collagen | H363-A43  | LM-107 | 6720  | 40  | 7587           | 7665         | 7509         | This study  |
| BK 81022    | charcoal      | F371      |        | 6740  | 80  | 7587           | 7731         | 7444         | 34          |
| CAMS 134374 | charcoal      | DDW03     |        | 6860  | 50  | 7705           | 7819         | 7592         | 50, 51      |
| BK 80025    | charcoal      | H10       |        | 6950  | 90  | 7786           | 7950         | 7622         | 34          |

The archaeological provenience (prov) corresponds to locations named during original excavations. Radiocarbon data from the original excavations are drawn from the excavation report (34) and the radiocarbon database of the Institute of Archaeology, Chinese Academy of Social Science (48). Additional information can be found from each reference. Question marks indicate data gaps. Unreported sample types (material) are most likely charcoal. It is unclear how many of the dates from the original excavation were  $\delta^{13}\text{C}$ -corrected. Though use of the 5570 half-life is standard procedure in Chinese radiocarbon labs, all radiocarbon ages (rcybp) This study reflects the 5568 Libby half-life. All calibrations are with OxCal 4.0 using the INTCAL 04 calibration curve.
